1 **Title Page**

2 **Genome-centric portrait of the microbes' cellulolytic competency**

3 **Authors:** Yubo Wang<sup>1\*</sup>, Liguan Li<sup>1\*</sup>, Yu Xia<sup>1,2</sup>, Feng Ju<sup>3</sup>, Tong Zhang<sup>1,2#</sup>

4 **Author affiliation:**

5 1. Environmental Microbiome Engineering and Biotechnology Laboratory, Centre for  
6 Environmental Engineering Research, The University of Hong Kong, Hong Kong SAR, China

7 2. School of Environmental Science and Engineering, Southern University of Science and  
8 Technology, Shenzhen, China

9 3. Department of Environmental and Resource Engineering, Westlake University, Hangzhou,  
10 China

11 **# Corresponding author:**

12 Address: Environmental Biotechnology Lab,

13 The University of Hong Kong,

14 Pokfulam Road, Hong Kong

15 Tel: 852-28591968 (lab), 28578551 (office)

16 Fax: 852-25595337

17 E-mail: [zhangt@hku.hk](mailto:zhangt@hku.hk)

18

19

20

21 **Running Title:** Pipeline developed for cellulolytic genomes annotation

## 22 **Abstract**

23 **Abstract:** Neither the abundance of the exo/endoglucase GH modules nor the  
24 taxonomy affiliation is informative enough in inferring whether a genome is of a  
25 potential cellulolytic microbe or not. By interpreting the complete genomes of 2642  
26 microbe strains whose phenotypes have been well documented, we are trying to  
27 reveal a more reliable genotype and phenotype correlation on the specific function  
28 niche of cellulose hydrolysis. By incorporating into the annotation approach an  
29 automatic recognition of the potential synergy machineries, a more reliable prediction  
30 on the corresponding microbes' cellulolytic competency could be achieved. The  
31 potential cellulose hydrolyzing microbes could be categorized into 5 groups according  
32 to the varying synergy machineries among the carbohydrate active modules/genes  
33 annotated. Results of the meta-analysis on the 2642 genomes revealed that some  
34 cellulosome gene clusters were in lack of the surface layer homology module (SLH)  
35 and microbe strains annotated with such cellulosome gene clusters were not certainly  
36 cellulolytic. Hypothesized in this study was that cellulosome-independent genes  
37 harboring both the SLH module and the cellulose-binding carbohydrate binding  
38 module (CBM) were likely an alternative gene apparatus initiating the formation of  
39 the cellulose-enzyme-microbe (CEM) complexes; and their role is important  
40 especially for the cellulolytic anaerobes without cellulosome gene clusters.

41 **Importance:** In the genome-centric prediction on the corresponding microbes'  
42 cellulolytic activity, recognition of the synergy machineries that include but are not  
43 limited to the cellulosome gene clusters is equally important as the annotation of the  
44 individual carbohydrate active modules or genes. This is the first time that a pipeline  
45 was developed for an automatic recognition of the synergy among the carbohydrate  
46 active units annotated. With promising resolution and reliability, this pipeline should

47 be a good add to the bioinformatic tools for the genome-centric interpretations on the  
48 specific function niche of cellulose hydrolysis.

49 **Key words:** Pipeline, genome-centric, function interpretation, cellulolytic, synergy  
50 machineries.

## 51 **Background**

52 In the era of high-throughput sequencing, the genetic information that is inherently  
53 whispering hints of the microbes' function niches is becoming easily accessible (1, 2).  
54 However, the bottleneck remains largely on properly identifying and characterizing  
55 these genetic hints and inferring the microbes' function potentials. In this study, we  
56 focus on the genome-centric interpretation on the specific function niche of cellulose  
57 hydrolysis. Traditional approaches, including the microscope observation, cultivation  
58 of the cellulose-degrading microbes, as well as purification and characterization of the  
59 cellulolytic enzymes (3, 4), have set a good foundation in understanding how the  
60 microbes and their enzymes may interact with the cellulosic substrates. Although it is  
61 believed that most of the cellulolytic microbes may still be hiding in plain sight due to  
62 the isolation bottleneck, access to their genome information has opened a new  
63 window to shed light on them.

64 Regarding to the genome-centric interpretations on the function niche of cellulose  
65 hydrolysis, current annotation approaches focus on tapping the diversity and the  
66 abundance of the individual carbohydrate active enzyme (CAZy) modules annotated.  
67 Applying the HMMsearch-based dbCAN annotation platform, referring to the  
68 well-curated CAZy database (5, 6), a decent amount of information on the abundances  
69 of the diverse CAZy modules in a genome could be obtained. However, often  
70 encountered in practice was a lack of confidence in predicting the microbes' real

71 cellulolytic competency based solely on the abundances of the relevant CAZy modules  
72 annotated. For example, a total number of 21 exo/endoglucanase GH modules in the  
73 genome of *Actinoplanes missouriensis* 431 could not point to a conclusion that this  
74 strain was able to hydrolyze cellulose (7); and it remains a puzzle why *Clostridium*  
75 *acetobutylicum*, with the cellulosome gene cluster identified in its genome, do not have  
76 the cellulose degrading capability (8-10).

77 What is in lack in current genome-centric interpretations is the recognition of the  
78 synergy among the individual CAZy modules and among the carbohydrate active genes  
79 harboring these CAZy modules, although such synergy is one of the highly-appreciated  
80 features in efficient cellulose hydrolysis (11, 12). Cellulolytic enzymes are known as  
81 modular proteins, the most straightforward synergy would occur among the diverse  
82 CAZy modules in one single gene/enzyme; e.g., if one gene has both the  
83 cellulose-binding module CBM6 and the exoglucanase module GH9, the CBM6 could  
84 help bring this GH9 to its action site. A higher level of synergy would occur among the  
85 diverse carbohydrate active enzymes in one microbe, on which aspect, cellulosomes is  
86 the most highly recognized synergy machinery in anaerobes; and the CEM complex  
87 initiated by hypha penetration is the more commonly observed synergy mechanism in  
88 aerobic cellulolytic *Fungi* (11). Although the carbohydrate active enzymes did not  
89 assemble into one entity as those in the cellulosome complexes (9, 17), in the CEM  
90 complex of some aerobic *Fungi*, physical closeness among the individual carbohydrate  
91 active enzymes sandwiched in between the *Fungus* cells and the cellulose substrates  
92 makes the synergy among these enzymes possible (18-22).

93 May the formation of the cellulosome independent CEM complexes be possible in  
94 anaerobes? This question is raised in the context of the fact that the number of the

95 cellulolytic anaerobes is much larger than the number of anaerobes with cellulosome  
96 gene clusters. Most cellulolytic species were of their optimal growth rates when they  
97 adhere to the cellulosic substrate, and the microbe-cellulose contact is important for  
98 the host microbes to get easy access to the enzymatic hydrolyzing products (15, 16). It  
99 has also been reported that the excreted free cellulase would contribute little to the  
100 microbes' cellulolytic activity (11, 15). Taken together, the physical closeness in the  
101 form of the CEM complex might be critical for microbial cellulose hydrolysis. It is not  
102 common to observe in anaerobes the physical apparatus like hypha to facilitate the  
103 physical penetration as in Fungus, having been reported in literature was that the  
104 hypothesized glycocalyx mediated microbe-cellulose contact in anaerobes (23). One  
105 of the objectives of this study is, by investigating complete genomes of the 2642  
106 microbe strains whose phenotypes have been well characterized, to uncover potential  
107 alternative genetic machineries (in lieu of the cellulosome complexes) that may  
108 initiate the CEM complex formation through the microbe-cellulose adhesion,  
109 especially in anaerobes.

110 Physical link or physical closeness is important for the synergy interactions among the  
111 carbohydrate active units (13). One recent progress in the recognition of the  
112 physical-link among the carbohydrate active genes was the establishment of the  
113 polysaccharide-utilization loci (PUL) database (14). In this study, we are trying to  
114 introduce the annotation of two more features regarding the physical connections  
115 among the CAZy modules and among the carbohydrate active enzymes: 1) clustering  
116 patterns among the CAZy modules along genes; and 2) machineries that may facilitate  
117 the assembly or physical aggregation of the diverse carbohydrate active enzymes in one  
118 microbe.

119 To summarize, for a reliable genotype and phenotype correlation on the specific  
120 function niche of cellulose hydrolysis, starting with the meta-analysis of the complete  
121 genomes of the 2642 microbe strains, we are aiming to test the possibility of  
122 developing an annotation pipeline for: 1) an automatic recognition of the clustering  
123 patterns among the CAZy modules in carbohydrate active genes in genomes, 2)  
124 recognition of potential alternative genetic machineries for the CEM complex  
125 formation in microbes, and 3) categorization of the genomes of potential cellulolytic  
126 microbes. The applicability of the pipeline in the annotation of metagenome assembled  
127 genomes (MAGs) could be further tested with the annotation of 7904 reference  
128 genomes downloaded from NCBI.

## 129 **Results**

### 130 **Co-occurring patterns among the CAZy modules in the** 131 **carbohydrate active genes**

132 Genes are the basic units encoding enzymes, presented in Figure 1 and the Appendix  
133 file 1 are the frequencies at which CAZy modules co-occurring with each other in  
134 same genes; and these frequencies were calculated from the CAZy modules in  
135 carbohydrate active genes annotated in the 2642 complete genomes.

136 One of the most distinctive co-occurrences was observed between the exoglucanase  
137 GH modules (GH6, GH9 and GH48) and the cellulose binding CBMs modules  
138 (dominantly CBM2, CBM3 and CBM30). Among the CAZy modules annotated in the  
139 2642 complete genomes, 51% of the GH48 modules were observed being present in  
140 same genes with the CBM2 module; and CBM2 was also observed in 29% of the  
141 genes harboring the GH6 module. This is in accord with the reported importance of

142 the CBM modules in: 1) the initiation of the exo/endoglucanase GH modules'  
143 hydrolytic activity and 2) the progressiveness of the exoglucanase along the cellulose  
144 chains (11). Similarly observed was the co-occurrence between the xylanase GH  
145 modules (e.g., GH53, GH10) and the hemicellulose binding CBM modules (e.g.,  
146 CBM61, CBM22), e.g., 26% of the genes harboring the GH10 module would also  
147 carry the CBM22 module.

148 Besides their high frequencies co-occurring with the cellulose-binding CBM modules,  
149 GH9 and GH48 were also the two modules with the highest frequencies co-occurring  
150 with the dockerin module, e.g. ~23% of the GH9-harboring genes were also identified  
151 with the dockerin module; and this suggested that GH9 and GH48 might be the two  
152 most common catalytic components in the cellulosome complexes. Collaboration  
153 between the exoglucanase and the endoglucanase was another important synergy  
154 pattern in cellulose hydrolysis; and this corresponded with the observation that ~20%  
155 of the exoglucanase GH48 module coexisted in same genes as the endoglucanase  
156 GH74 module.

## 157 **Categorization of the carbohydrate active genes**

158 Part of the visualization of the CAZy module arrangement along carbohydrate active  
159 genes is demonstrated in Figure 2. According to the CAZy modules they harbor, the  
160 carbohydrate active genes could be classified into two broad categories: genes of the  
161 cellulosome gene clusters and carbohydrate active genes independent of the  
162 cellulosome gene clusters. As is summarized in Table 1, the cellulosome gene clusters  
163 consist of two parts, the scaffold genes (A1, A2 and A3) and genes of the catalytic  
164 components (A-s: dockerin + GH/CBM). The scaffold genes in the cellulosome gene  
165 clusters could be further categorized into three types ('A1', 'A2' and 'A3'), according

166 to whether the SLH module is initially in (type ‘A1’) or at least could be incorporated  
167 (type ‘A2’) into these scaffold genes. The integration of the ‘A2-a’ gene and the  
168 ‘A2-b’ gene by the dockerin and cohesion modules would incorporate the SLH  
169 module into the type ‘A2’ scaffolds. The scaffold genes of type ‘A3’ are in lack of the  
170 SLH module.

171 Among the carbohydrate active genes independent of the cellulosome gene  
172 clusters, what might have been underestimated was the role of genes (type ‘B’)  
173 harboring both the SLH module and the cellulose-binding CBM modules.  
174 Theoretically, enzymes encoded by these SLH-CBM genes could adhere onto the  
175 microbes’ cell surface through its SLH module, and the cellulose-binding CBM  
176 counterpart could help drag the SLH-attached microbe cell to its cellulosic substrates.  
177 Such microbe-cellulose adhesion facilitated by these SLH-CBM enzymes might help  
178 sandwich the excreted carbohydrate enzymes in between the microbe cell and the  
179 cellulosic substrate, in which way the CEM complex would form. It is reasonable to  
180 speculate that, similar as the hypha mediated CEM complex, the SLH-CBM mediated  
181 CEM complex may provide the same physical closeness needed for the synergy  
182 among enzymes aggregating in between the microbe cell and the cellulose substrate.  
183 There are two other types of cellulosome-independent cellulolytic active genes: type  
184 ‘C’ and type ‘D’; both type ‘C’ and type ‘D’ genes harbor the cellulolytic GH  
185 modules; and the cellulose-binding CBM modules were identified in type ‘C’ genes  
186 but not in type ‘D’ genes.

### 187 **Categorization of genomes of potential cellulolytic microbes**

188 As has been summarized in Table S1, among the 2642 microbe strains investigated,  
189 only 270 strains were identified with both the exoglucanase GH modules and the



190 endoglucanase GH modules in their genomes. The genomes of these 270 microbe  
191 strains harboring both the exoglucanase and endoglucanase GH modules were  
192 preliminarily categorized into Group I in this study. Result of the meta-analysis  
193 suggested that only genomes in Group I were of potential cellulose hydrolyzing  
194 microbes. It was noted that a total number of only one exo/endo GH module (in quite  
195 few cases, a total number of two exo/endo GH modules) would be identified in a  
196 genome if this genome was annotated with only the exoglucanase GH modules or  
197 with only the endoglucanase GH modules, and none of these genomes are of microbe  
198 strains with reported cellulolytic activities.

199 The 270 genomes in Group I could be further categorized into six subgroups (Group  
200 I-a, Group I-b, ..., Group I-f), according to the types of carbohydrate active genes  
201 they harbor. The criteria for this categorization are summarized in Table 2.  
202 Cellulosome gene clusters were identified in genomes of the first three subgroups:  
203 Group I-a, Group I-b and Group I-c. Unlike that of the Group I-a genomes in which  
204 the scaffold genes were of either type A1 or type A2 (with SLH module), the  
205 scaffold-genes in genomes of both Group I-b and Group I-c were of type 'A3'  
206 (without SLH module). The differentiating feature of genomes in Group I-b and  
207 Group I-c is that cellulosome-independent SLH-CBM genes were identified in  
208 genome of Group I-b, which may act as an alternative microbe-cellulose adhesion  
209 machinery; while such cellulosome-independent SLH-CBM genes were absent in  
210 genomes of Group I-c.

211 The other three subgroups (Group I-d, Group I-e and Group I-f) were all free of the  
212 cellulosome gene clusters. Among these three subgroups, the SLH-CBM genes were  
213 identified only in genomes of Group I-d; the cellulose binding CBMs were observed

214 in at least one of the cellulolytic genes in genomes of Group I-e; and genomes of  
215 Group I-f were featured with the annotation result that all of their cellulolytic genes  
216 were free of the cellulose-binding CBM modules. A detailed summary on the  
217 diversity and abundances of the various carbohydrate active genes annotated, and the  
218 categorization of these 270 genomes could be found in the Appendix file 2.

## 219 **Cellulolytic competency of genomes categorized into the different** 220 **subgroups**

221 What would the varying genome features indicate on the corresponding microbes'  
222 cellulolytic competency? As has been illustrated in the above section, cellulosome  
223 gene clusters are present in three subgroups: Group I-a, Group I-b and Group I-c.  
224 Among the 2642 microbe strains, the three strains assigned to Group I-a: *R.*  
225 *thermocellum* ATCC 27405, *R. thermocellum* DSM 1313 and *C. clariflavum* DSM  
226 19732 were all paradigm cellulolytic microorganisms with tethered cellulosome  
227 complexes and the highest cellulose hydrolyzing rates reported (24, 26, 27). Both *C.*  
228 *sp.* BNL1100 and *C. cellulolyticum* H10 assigned to Group I-b were reported as  
229 proficient cellulose hydrolysers with cellulosome complexes observed (28, 29). There  
230 were four strains assigned to Group I-c, being *C. acetobutylicum* ATCC 824, *C.*  
231 *cellulovorans* 743B, *C. acetobutylicum* EA 2018 and *C. acetobutylicum* DSM 1731,  
232 respectively; except for *C. cellulovorans* 743B, the three strains of the *C.*  
233 *acetobutylicum* were all inert in crystalline cellulose hydrolysis (8, 28, 30).

234 Genomes assigned to Group I-d were in two distinct taxonomy groups: strains from  
235 the aerobic genus of *Paenibacillus* and strains from the anaerobic genus of  
236 *Caldicellulosiruptor*. The seven anaerobic strains in *Caldicellulosiruptor* were all  
237 characterized as being cellulolytic (31-37); and the eight aerobic strains of  
238 *Paenibacillus* were principally known as plant growth promoter residing either in soil

239 with rich forest residuals or in plant root systems (9, 38-43). The mutualism between  
240 *Paneibacillus* and the plant may proceed in a way that the bacteria provide growth  
241 hormones and antibiotics to plants, and the plant residues may provide the  
242 *Paneibacillus* strains with their carbohydrate substrates.

243 The total number of the exo/endoglucanase GH modules annotated in genomes of  
244 Group I-f varied from 2 to 8, and none of their cellulolytic GH modules were in same  
245 genes as the cellulose-binding CBM modules; correspondingly, strains in Group I-f  
246 were all inert in cellulose utilization. The total number of the exo/endoglucanase GH  
247 modules annotated in genomes of Group I-e were in a wide range of 2- 35, and at least  
248 one of its carbohydrate active genes harbored both the cellulolytic GH module and the  
249 cellulose-binding CBM module. The cellulolytic capacity of microbes in Group I-e  
250 varied from being non-cellulolytic to polysaccharides-utilizer to cellulolytic. And  
251 there was no apparent correlation between the number of the exo/endoglucanase GH  
252 modules annotated and the corresponding microbe's cellulolytic capability. For  
253 example, *Stercorarium subsp.* DSM8532 was cellulolytic with a total number of only  
254 5 exo/endoglucanase GH modules annotated in its genome (44); while *Actinoplanes*  
255 *missouriensis* 431 was not able to grow on cellulose although a total number of 21  
256 exo/endoglucanase GH modules were annotated in its genome (44).

257 Phylogeny of the 2642 genomes were visualized in the circle tree in Figure 3;  
258 genomes assigned into Group I-a, Group I-b, Group I-c, Group I-d and Group I-e  
259 were highlighted in different colors; genomes of Group I-f were not highlighted in  
260 this circle tree since none of them were cellulolytic. Cellulolytic capability was not  
261 highly conservative phylogenetically. For example, among the 13 strains in the genus  
262 of *Clostridium* (Appendix file 2), 1 of them was assigned to Group I-b, 4 in Group I-c,

263 1 in Group I-e; and all the other 7 strains in this genus were not cellulolytic. The  
264 results further signified that it might not be a workable approach to predict the  
265 corresponding microbe's cellulolytic capability based solely on the phylogenetic  
266 affiliation of a genome.

267 **The pipeline developed and its application in the annotation of the**  
268 **metagenome assembled genomes on the function niche of cellulose**  
269 **hydrolysis**

270 To facilitate an automatic identification and categorization of the potential cellulolytic  
271 genomes, the categorizing criteria proposed in this study were embodied in R scripts.  
272 Description of the overall analysis flow and the usage of the scripts could be found in  
273 Github. The applicability of this annotation pipeline was further tested with the  
274 annotation of the 7904 reference genomes downloaded from NCBI.

275 Pairing with the dbCAN annotation results, this pipeline was very time-efficient in  
276 identifying and categorizing genomes of the potential cellulolytic microbes. It took  
277 ~30 minutes to get: 1) a summary of the diversity and abundances of all the CAZy  
278 modules identified in each of these 7902 genomes (Appendix file 3); 2) abundances of  
279 the diverse carbohydrate active genes in each genome (Appendix file 4); and 3)  
280 assignment of the potential cellulose hydrolyzing genomes into 6 subgroups according  
281 to the varying synergy machineries annotated (Appendix file 4). Among the 7904  
282 reference genomes annotated, 5 were assigned into Group I-a, 9 genomes were in  
283 Group I-b, 15 genomes were in Group I-c, 3 genomes in Group I-d, 15 genomes in  
284 Groups I-e and 8 genomes in Group I-f. Figure S1 presents the phylogeny of genomes  
285 in the first five sub-groups. Consistent with results of the survey on the 2642 complete  
286 genomes, cellulosome-gene clusters were annotated only in a small number of

287 microbes, and the varying cellulolytic capabilities were not phylogenetically  
288 conservative.

## 289 **Discussion**

290 Cellulosome complexes by its nature could enable the assembly of a number of  
291 carbohydrate active units. In previous genome-centric interpretation on the function  
292 niche of cellulose hydrolysis, the presence of the cellulosome gene clusters was  
293 always taken as an indicator of the efficient cellulose hydrolysers. However, results of  
294 this survey suggested that not all cellulosomal gene clusters and the corresponding  
295 cellulosome complexes were of the classical configuration, and a finer classification  
296 of the cellulosome gene clusters is needed. Cellulosomal complexes in lack of the  
297 SLH module might not be cell surface adhering, and the formation of the CEM  
298 complex should be aided by some cellulosome-independent SLH-CBM genes. Free  
299 cellulosomal complexes that could not be held in between the microbe cell and the  
300 cellulosic substrate would limit the microbes' access to the enzymatic hydrolyzing  
301 products, in which case, the host microbe might become reluctant in the  
302 energy-consuming synthesis and assembly of cellulosomes. This may explain why the  
303 three *C. acetobutylicum* strains were all inert in cellulose hydrolysis although  
304 cellulosome gene clusters were identified in their genomes.

305 The potential role of the cellulosome independent SLH-CBM genes in initiating the  
306 microbe-cellulose contact was highlighted in this study. Proposed in this study was  
307 that the cellulosome independent enzymes encoded by genes (represented by  
308 'SLH-CBM' gene in this study) harboring both the SLH module and the  
309 cellulose-binding CBM module might be an alternative machinery facilitating the

310 microbe-cellulose adhesion. And such microbe-cellulose contact could further initiate  
311 the formation of the CEM complex by sandwiching the carbohydrate active enzymes  
312 in between the microbe cells and the cellulosic substrate. The physical closeness in  
313 the form of the CEM complex could guarantee: 1) synergy among the enzymes  
314 (including the free cellulosome complexes) physically constrained in confined areas,  
315 and 2) easy access to the enzymatic hydrolyzing products by the host microbes. *C.*  
316 *acetobutylicum* strains were important for industrial production of  
317 acetone/ethanol/propanol, the possibility of *C. acetobutylicum* being able to ferment  
318 cellulose would introduce new possibilities for more sustainable solvent production  
319 from cheap substrates that include the lignocellulose biomass [48]. One scenario  
320 proposed in this study to make the *C. acetobutylicum* strains cellulolytic active is by  
321 introducing the SLH-CBM genes into their genomes.

322 One limitation of this study is that we do not think there is no other microbe-cellulose  
323 adhesion machineries exist except for the SLH-CBM genes and the cellulosomal  
324 complexes, especially in anaerobes. However, the current knowledge on these  
325 alternative machineries are limited. For example, glycocalyx containing extracellular  
326 polymeric substances (EPS) was reported as a “glue” between the microbe cell and  
327 the cellulosic substrates in *R. albus* 7 (45), while we are not sure about the indicator  
328 gene for the synthesis of such “glue”. This limitation leads to the uncertainty in the  
329 genome-centric interpretation on the cellulolytic capacity of microbes assigned into  
330 Group I-c and Group I-e. Novel microbe-cellulose adhesion mechanisms might exist in  
331 the cellulolytic microorganisms assigned into Group I-c or Group I-e, e.g., *C.*  
332 *cellulovorans* 743B (Group I-c) and *R. champanellensis* 18P13 (Group I-e). Another  
333 factor that needs to be considered in the application of this pipeline is that the quality of

334 the genome matters, more reliable functional interpretation is expected for genomes  
335 with higher completeness and lower contamination.

336 Overall speaking, in the interpretation of MAGs on the function niche of cellulose  
337 hydrolysis, the results returned by the annotation approach developed in this study is of  
338 good resolution and reliability. Only these genomes assigned into Group I-a, Group I-b,  
339 Group I-c, Group I-d and Group I-e are of potential cellulolytic microorganisms. And  
340 among these five groups, genomes of Group I-a and Group I-b correspond to  
341 cellulolytic microbes with cellulosome complexes. Genomes of Group I-d are of  
342 cellulolytic microbes without cellulosome complexes, and the SLH-CBM genes might  
343 play essential roles in facilitating the CEM complex formation for microbes in this  
344 group. Genomes of Groups I-c and Group I-e might be cellulolytic, while the  
345 uncertainty comes not from whether they may harbor potentially novel  
346 microbe-cellulose adhesion machineries that could not be recognized by this pipeline.

## 347 **Conclusion**

348 In summary, this is the first time that a pipeline was developed for reliable  
349 genome-centric interpretation on the function niche of cellulose hydrolysis. The  
350 potential cellulose hydrolyzing microbes could be categorized into 5 groups according  
351 to the varying synergy mechanisms among the carbohydrate active modules/genes  
352 annotated. Pairing with the dbCAN annotation platform, this pipeline is very efficient  
353 in identifying potential cellulose hydrolysers by interpreting the complete genomes or  
354 MAGs recovered through high-throughput sequencing.

## 355 **Methods**

356 5243 GenBank Format (GBK) files corresponding to 2786 prokaryote with complete  
357 genomes were downloaded from the NCBI genomes FTP site  
358 ([ftp://ftp.ncbi.nlm.nih.gov/genomes/archive/old\\_genbank/Bacteria/](ftp://ftp.ncbi.nlm.nih.gov/genomes/archive/old_genbank/Bacteria/)). The reason why  
359 this old archive collection (last updated on Dec. 2<sup>nd</sup>, 2015) was chosen in this study  
360 was that, comparing with the most recently updated archive, this collection had a  
361 higher portion of complete genomes from strains whose phenotypes have been well  
362 characterized; and the documented phenotypes make it possible to evaluate the  
363 reliability of the genome-centric prediction on the corresponding microbes'  
364 cellulolytic capability. Another batch of 7904 reference genomes were also  
365 downloaded from NCBI (<ftp://ftp.ncbi.nlm.nih.gov/genomes/refseq/bacteria/>)  
366 (updated on February, 2019), and there are metagenome assembled genomes (MAGs)  
367 among these 7904 reference genomes. These 7904 reference genomes were used to  
368 evaluate the applicability of the pipeline in the batch annotation of a large number of  
369 MAGs. A detailed summary on these 7904 reference genomes could be found in  
370 Appendix file 5.

371 Fasta Amino Acid sequences (FAA) of the coding regions (often abbreviated as CDS)  
372 were extracted from the GBK files with a python script. The FAA files were then  
373 subjected to the dbCAN HMMsearch for the CAZy module annotation, following the  
374 HMMsearch criteria (e.g. cutoff value) recommended by the dbCAN developers (6).  
375 CAZy (carbohydrate active enzymes) modules were identified in 3898 of these FAA  
376 files that corresponded to 2642 prokaryotic strains. The assembly accession numbers  
377 and taxonomy affiliation of these 2642 strains have been summarized in the Appendix  
378 file 6. As the chromosome and the plasmid in one same microbe strain have separate



379 FAA files, results of the annotation of those separate FAA files of the chromosome  
380 and the plasmid in one same microbe strain would be aggregated to represent all the  
381 CAZy modules annotated in one microbe strain.

382 The GH modules that were relevant in the cellulose hydrolysis were classified and  
383 read as the exoglucanase GH modules, the endoglucanase GH modules, the xylanase  
384 GH modules and the glucosidase GH modules, respectively (Table S2). The CBM  
385 modules were classified and read as the cellulose-binding CBM modules, the  
386 hemicellulose-binding CBM modules and other CBM modules, respectively (Table  
387 S3). The dockerin, cohesion and the SLH modules were the three important accessory  
388 modules in the cellulosome gene clusters. Based on the survey of the carbohydrate  
389 active genes in the 2642 complete genomes, frequencies of the CAZy modules  
390 co-occurring with one another in same genes were calculated; and the principles  
391 applied in such calculation could be found in the supporting information.

392 Applying the *genoplots* package in R (46), the CAZy module arrangement along  
393 genes in genomes could be visualized. Batch visualization of the arrangement of the  
394 CAZy modules along all the carbohydrate active genes annotated in each complete  
395 genome or MAG could be achieved. Scripts of the pipeline and workflow of the  
396 pipeline have been well documented in Github. In addition to the interpretation of the  
397 complete genomes from the 2642 CAZy-harboring strains, and the 7904 reference  
398 genomes downloaded from NCBI, the pipeline developed in this study was also  
399 applied in the annotation of 17 metagenome assembled genomes (MAGs) recovered  
400 from a cellulose converting consortia enriched in our previous study (47). These 17  
401 MAGs can be applied as an example dataset to work with, and all the raw data and  
402 results generated on these 17 MAGs have also been deposited in the Github.

403 **Figures and Tables**

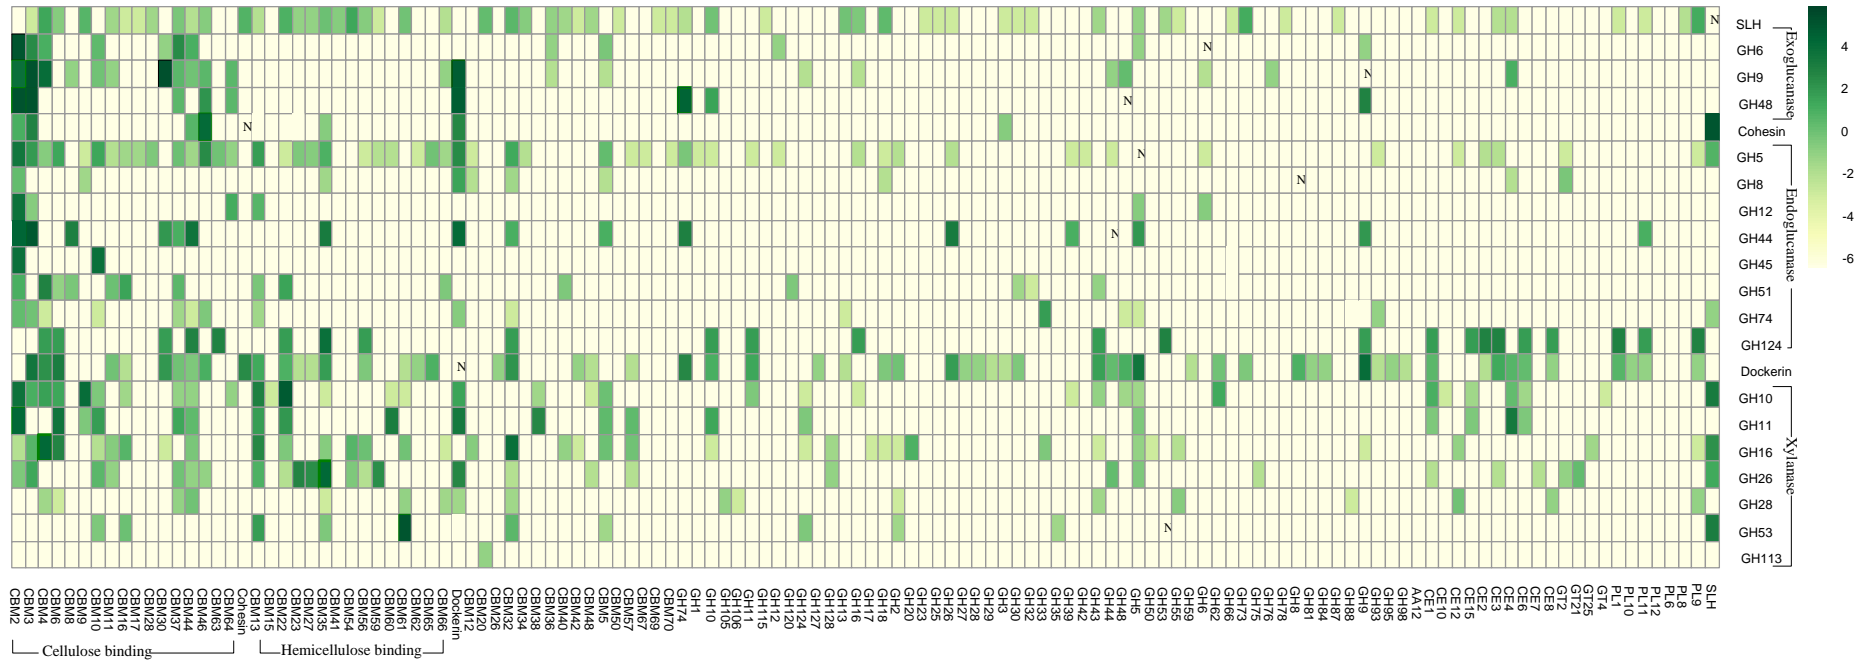

404

405

Figure 1. Co-occurrence frequencies among the CAZY modules

406

407

408

409

Note: Vertically listed were the twenty-one selected CAZY modules, including the three exoglucanase GH modules, the eight endoglucanase GH modules, the seven xylanase GH modules, the cohesin, the dockerin and the SLH module. The CAZY modules lining horizontally were those modules being observed in same genes with at least one of the vertically listed CAZY modules. The scale bar on the right presented the co-occurring frequencies (x) in the log format of  $\lg(x+0.01)$ , and the plain number 'x' was summarized in the Appendix file 2.

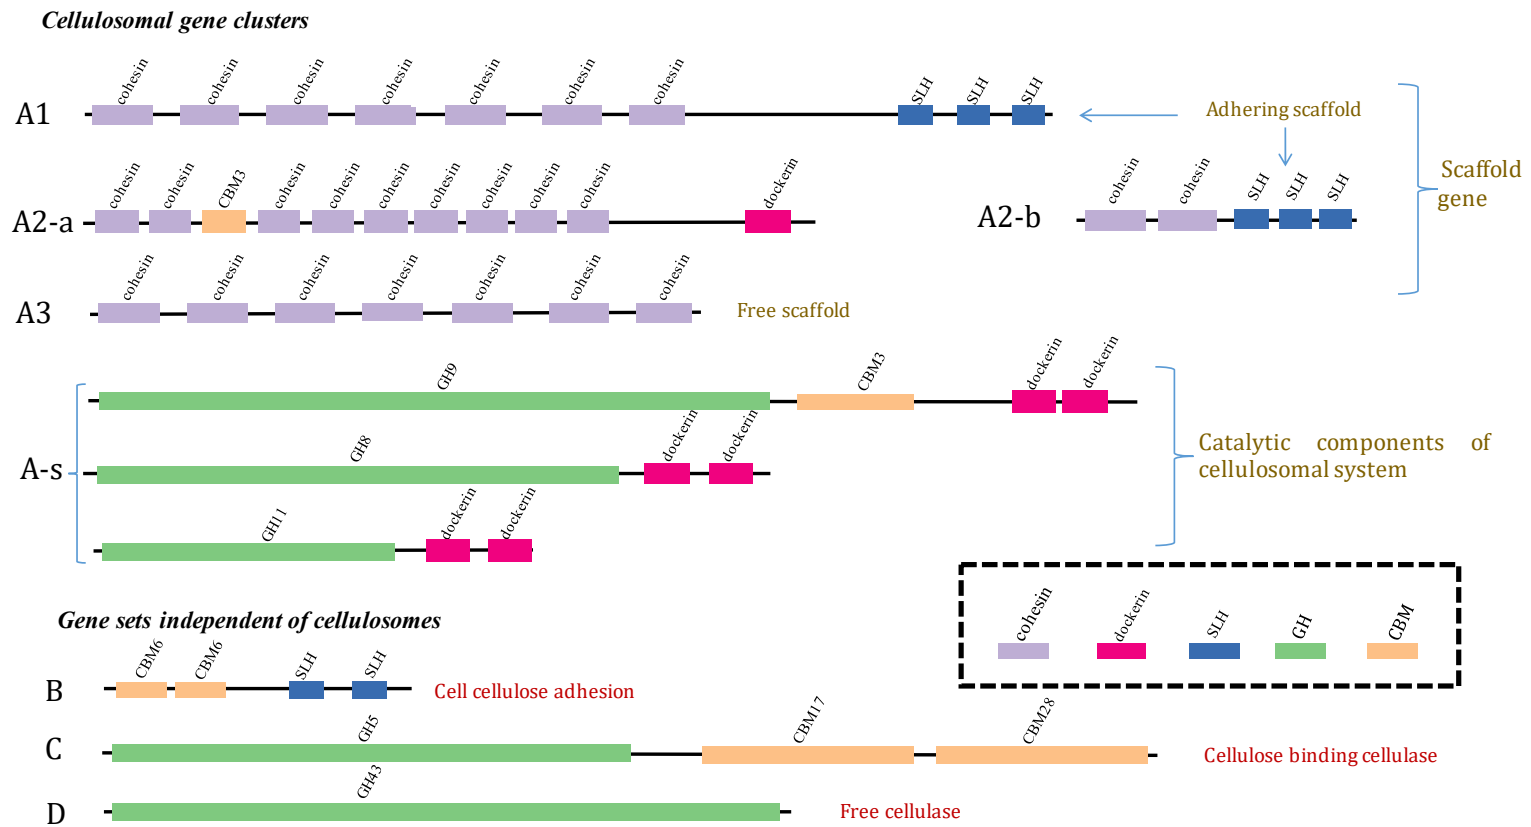

410

**Figure 2** Illustration on the clustering patterns of the CAZy modules along gene

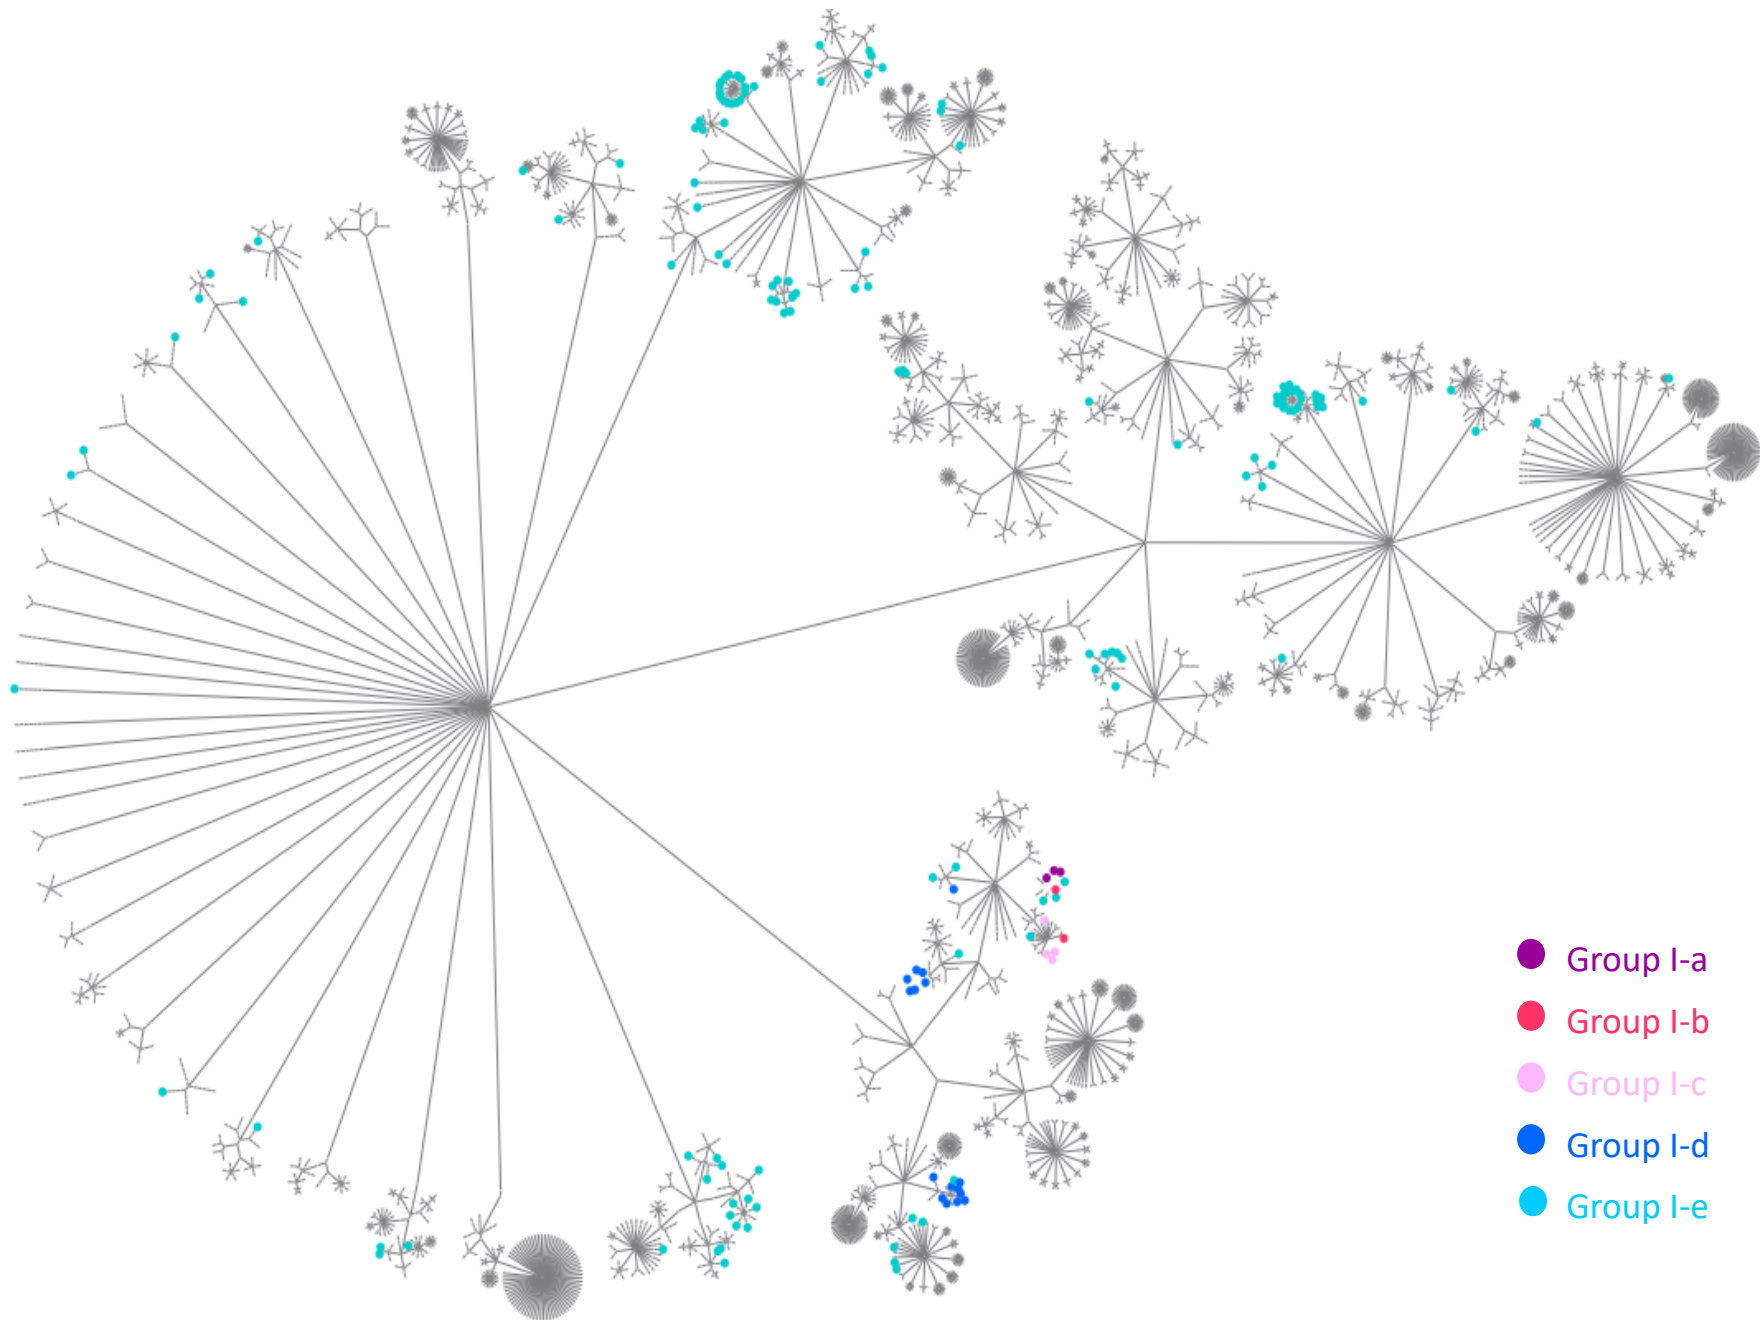

412 **Figure 3.** Circle tree of the 2642 genomes. The taxonomy levels of Kingdom (*Bacteria*), phylum, class, order, family, genus and strain were  
413 presented by the successive inner nodes. Genomes assigned to the first 5 subgroups of Group I are highlighted in 5 colors.

414 **Table 1** Categorization of genes based on the CAZy modules they harbor

| Gene type                                |                           |      | Abundance of modules in one gene |         |         |     |     | Gene Description                                            |
|------------------------------------------|---------------------------|------|----------------------------------|---------|---------|-----|-----|-------------------------------------------------------------|
|                                          |                           |      | SLH                              | Dokerin | Cohesin | GH  | CBM |                                                             |
| Cellulosomal<br>gene clusters            | Scaffold<br>gene          | A1   | >=1                              | 0       | >=3     | >=0 | >=0 | Adhering scaffold<br>(Cohesin+Cohesin+...+Cohesin+SLH)      |
|                                          |                           | A2-a | >=0                              | >=1     | >=3     | >=0 | >=0 | Adhering scaffold<br>(Cohesin+Cohesin+...+Cohesin+Dockerin) |
|                                          |                           | A2-b | >=1                              | >=0     | >=1     | >=0 | >=0 | Counterparts of A2-a<br>(Cohesin+SLH)                       |
|                                          |                           | A3   | 0                                | 0       | >=3     | >=0 | >=0 | Free scaffold<br>(Cohesin+Cohesin+...+Cohesin)              |
|                                          | Catalytic<br>constituents | A-s  | >=0                              | >=1     | >=0     | >=1 | >=0 | Catalytic components to be assembled<br>(Dockerin+GH)       |
| Gene sets independent of<br>cellulosomes |                           | B    | >=1                              | >=0     | >=0     | >=0 | >=1 | microbe-cellulose adhesion<br>(SLH+ CBM)                    |
|                                          |                           | C    | >=0                              | >=0     | >=0     | >=1 | >=1 | Cellulose binding cellulase<br>(GH+CBM)                     |
|                                          |                           | D    | >=0                              | >=0     | >=0     | >=1 | 0   | Free cellulase<br>(Solitude GH)                             |

415 Note: The CBM in this table considered only the cellulose-binding CBM module, and the GH module in this table indicate only the exo/endoglucase GH  
416 modules.

**Table 2.** Sub-categorization of the genomes in Group I

| Abundance of different gene types identified |                    |             |            |                 | Category  | Number of genomes assigned in each group |
|----------------------------------------------|--------------------|-------------|------------|-----------------|-----------|------------------------------------------|
| Adhering scaffold (A1 or A2)                 | Free scaffold (A3) | SLH-CBM (B) | GH_CBM (C) | Solitude GH (D) |           |                                          |
| >=1                                          | >=0                | >=0         | >=0        | >=0             | Group I-a | 3                                        |
| 0                                            | >=1                | >=1         | >=1        | >=1             | Group I-b | 2                                        |
| 0                                            | >=1                | 0           | >=1        | >=1             | Group I-c | 4                                        |
| 0                                            | 0                  | >=1         | >=1        | >=1             | Group I-d | 16                                       |
| 0                                            | 0                  | >=1         | >=1        | >=0             |           |                                          |
| 0                                            | 0                  | >=1         | >=0        | >=1             |           |                                          |
| 0                                            | 0                  | 0           | >=1        | >=1             | Group I-e | 139                                      |
| 0                                            | 0                  | 0           | >=1        | 0               |           |                                          |
| 0                                            | 0                  | 0           | 0          | >=1             | Group I-f | 106                                      |

417

Note: the CBM in this table refers specifically to the cellulose-binding CBM module.

418 **Availability of data and materials**

419 All data generated or analyzed during this study are included in this manuscript, its  
420 supplementary information files and the appendix files. All scripts written in this  
421 study are available in  
422 <https://github.com/yuboer/genome-centric-portrait-of-cellulose-hydrolysis>.

423 **Additional files**

424 Appendix file1: CAZy modules cooccurring frequencies along genes

425 Appendix file2: Further categorization of complete genomes harboring both the exoglucanase  
426 and endoglucanase GH modules

427 Appendix file3: Abundance and diversity of CAZy modules in each of the 2642 complete  
428 genomes

429 Appendix file4: Summary of the carbohydrate active genes annotated and categorization of the  
430 270 complete genomes in Group I

431 Appendix file5: NCBI accession of the 7904 MAGs investigated

432 Appendix file6: Accession numbers of the 2642 complete genomes investigated

433 **Abbreviations**

434 SLH: Surface Layer Homology; CBM: Carbohydrate Binding Module; CEM:  
435 Cellulose-Enzyme-Microbe; MAGs: Metagenome Assembled Genomes (MAGs); NGS: Next  
436 Generation Sequencing; CAZy: Carbohydrate Active enzyme; PUL:  
437 Polysaccharide-Utilization Loci; EPS: Extracellular Polymeric Substances.

438 **Competing interests**

439 The authors declare no conflict of interest.

440



#### 441 **Authors' contributions**

442 Yubo Wang conceived the study, analyzed the data and wrote the manuscript. Liguan Li  
443 contributed resources of the 2642 complete genomes and the corresponding metadata collection;  
444 Yu Xia contributed in the CAZy modules annotation. Feng Ju contributed by providing  
445 constructive suggestions during the writing of this manuscript. Tong Zhang conceived the  
446 study. All authors edited the manuscript and approved the final draft.

#### 447 **Acknowledgments**

448 Yubo Wang wish to thank the University of Hong Kong for the postgraduate scholarship.  
449 Liguan Li and Yu Xia acknowledge the postdoc scholarship provided by the University of  
450 Hong Kong.

#### 451 **Funding**

452 This work was supported by National Key R&D Program of China (grant No.  
453 2018YFC0310600).

#### 454 **References**

- 455 1. Hug LA, Baker BJ, Anantharaman K, Brown CT, Probst AJ, Castelle CJ,  
456 Butterfield CN, HERNSDORF AW, Amano Y, Ise K, Suzuki Y, Dudek N, Relman  
457 DA, Finstad KM, Amundson R, Thomas BC, Banfield JF. 2016. A new view  
458 of the tree of life. *Nat Microbiol* 1:16048.
- 459 2. Parks DH, Rinke C, Chuvochina M, Chaumeil PA, Woodcroft BJ, Evans PN,  
460 Hugenholtz P, Tyson GW. 2017. Recovery of nearly 8,000  
461 metagenome-assembled genomes substantially expands the tree of life. *Nat*  
462 *Microbiol* 2:1533-1542.
- 463 3. Rastogi G, Muppidi GL, Gurram RN, Adhikari A, Bischoff KM, Hughes SR,  
464 Apel WA, Bang SS, Dixon DJ, Sani RK. 2009. Isolation and characterization  
465 of cellulose-degrading bacteria from the deep subsurface of the Homestake  
466 gold mine, Lead, South Dakota, USA. *J Ind Microbiol Biotechnol* 36:585-98.
- 467 4. Zuzana Mladenovska IMM, Birgitte K. Ahring. 1994. Isolation and  
468 characterization of *Caldicellulosiruptor lactoaceticus* sp. nov., an extremely  
469 thermophilic, cellulolytic, anaerobic bacterium. *Arch Microbiol* 163:223-230.

- 470 5. Cantarel BL, Coutinho PM, Rancurel C, Bernard T, Lombard V, Henrissat B.  
471 2009. The Carbohydrate-Active EnZymes database (CAZy): an expert  
472 resource for Glycogenomics. *Nucleic Acids Res* 37:D233-8.
- 473 6. Yin Y, Mao X, Yang J, Chen X, Mao F, Xu Y. 2012. dbCAN: a web resource  
474 for automated carbohydrate-active enzyme annotation. *Nucleic Acids Res*  
475 40:W445-51.
- 476 7. Uchida K, Jang MS, Ohnishi Y, Horinouchi S, Hayakawa M, Fujita N, Aizawa  
477 S. 2011. Characterization of *Actinoplanes missouriensis* spore flagella. *Appl*  
478 *Environ Microbiol* 77:2559-62.
- 479 8. Nolling J, Breton G, Omelchenko MV, Makarova KS, Zeng Q, Gibson R, Lee  
480 HM, Dubois J, Qiu D, Hitti J, Wolf YI, Tatusov RL, Sabathe F,  
481 Doucette-Stamm L, Soucaille P, Daly MJ, Bennett GN, Koonin EV, Smith DR.  
482 2001. Genome sequence and comparative analysis of the solvent-producing  
483 bacterium *Clostridium acetobutylicum*. *J Bacteriol* 183:4823-38.
- 484 9. Bayer EA, Belaich JP, Shoham Y, Lamed R. 2004. The cellulosomes:  
485 multienzyme machines for degradation of plant cell wall polysaccharides.  
486 *Annu Rev Microbiol* 58:521-54.
- 487 10. Sreekumar S, Baer ZC, Pazhamalai A, Gunbas G, Grippo A, Blanch HW,  
488 Clark DS, Toste FD. 2015. Production of an acetone-butanol-ethanol mixture  
489 from *Clostridium acetobutylicum* and its conversion to high-value biofuels.  
490 *Nat Protoc* 10:528-37.
- 491 11. Lynd LR, Weimer PJ, van Zyl WH, Pretorius IS. 2002. Microbial Cellulose  
492 Utilization: Fundamentals and Biotechnology. *Microbiology and Molecular*  
493 *Biology Reviews* 66:506-577.
- 494 12. Gaston Courtade RW, Asmund K. Rohr, Marita Preims, Alfons K.G. Felice,  
495 Maria Dimarogona, Gustav Vaajie-Kolstad, Morten Sorlie, Mats Sandgren,  
496 Roland Ludwig, Vincent G.H. Eijsink, and Finn Lillelund Aachmann. 2016.  
497 Interactions of a fungal lytic polysaccharide monooxygenase with  $\beta$ -glucan  
498 substrates and cellobiose dehydrogenase. *Proceedings of the National*  
499 *Academy of Sciences of the United States of America* 113:5922-5927.
- 500 13. Miron J, and C. W. Forsberg. 1999. Characterisation of cellulose-binding  
501 proteins that are involved in the adhesion mechanism of *Fibrobacter*  
502 *intestinalis* DR7. *Appl Microbiol Biotechnol* 51:491-497.
- 503 14. Terrapon N, Lombard V, Drula E, Lapebie P, Al-Masaudi S, Gilbert HJ,  
504 Henrissat B. 2018. PULDB: the expanded database of Polysaccharide  
505 Utilization Loci. *Nucleic Acids Res* 46:D677-D683.
- 506 15. Bayer EA, R. Kenig, and R. Lamed. 1983. Adherence of *Clostridium*  
507 *thermocellum* to cellulose. *Journal of Bacteriology*:818-827.

- 508 16. Raphael Lamed ES, Edward A. Bayer. 1983. Characterization of a  
509 cellulose-binding, cellulase-containing complex in *Clostridium thermocellum*.  
510 *Journal of Bacteriology* 156:828-836.
- 511 17. Doi RH, Kosugi A. 2004. Cellulosomes: plant-cell-wall-degrading enzyme  
512 complexes. *Nat Rev Microbiol* 2:541-51.
- 513 18. Akin DE, Lyon, C.E. , Windham, W.R. , and Rigsby, L.L. . 1989. Physical  
514 degradation of lignified stem tissues by ruminal fungi. *Applied and*  
515 *Environmental Microbiology* 55:611-616.
- 516 19. Akin DE, Borneman, W.S., and Lyon, C.E. 1990. Degradation of leaf  
517 blades and stems by monocentric and polycentric isolates of ruminal fungi.  
518 *Animal Feed Science and Technology* 31:205-221.
- 519 20. Tengerdy RP, W. H. Rho, and A. M. Mohagheghi. 1991. Liquid fluidized bed  
520 starter culture of *Trichoderma reesei* for cellulase production. *Applied*  
521 *Biochemistry and Biotechnology* 27:195–204.
- 522 21. Busto MD, Ortega, N., and Perez-Mateos, M. . 1996. Location, kinetics and  
523 stability of cellulases induced in *trichoderma reesei* cultures. *Bioresour*  
524 *Technol* 57:187-192.
- 525 22. Ho YW, and Abdullah, N. 1999. The role of rumen fungi in fibre digestion:  
526 Review. *Asian-Australas J Anim Sci* 12:104-112.
- 527 23. Kudo H, K.-J. Cheng, and J. W. Costerton. 1987. Electron microscopic study  
528 of the methylcellulose-mediated detachment of cellulolytic rumen bacteria  
529 from cellulose fibers. *Can J Microbiol* 33:267–271.
- 530 24. Feinberg L, Foden J, Barrett T, Davenport KW, Bruce D, Detter C, Tapia R,  
531 Han C, Lapidus A, Lucas S, Cheng JF, Pitluck S, Woyke T, Ivanova N,  
532 Mikhailova N, Land M, Hauser L, Argyros DA, Goodwin L, Hogsett D,  
533 Caiazza N. 2011. Complete genome sequence of the cellulolytic thermophile  
534 *Clostridium thermocellum* DSM1313. *J Bacteriol* 193:2906-7.
- 535 25. Jacqueline Giallo CG, Jean-Pierre Belaich. 1985. Metabolism and solubilization  
536 of cellulose by *Clostridium cellulolyticum* H10. *Applied and Environmental*  
537 *Microbiology* 49:1261-1221.
- 538 26. Ellis LD, Holwerda EK, Hogsett D, Rogers S, Shao X, Tschaplinski T, Thorne  
539 P, Lynd LR. 2012. Closing the carbon balance for fermentation by *Clostridium*  
540 *thermocellum* (ATCC 27405). *Bioresour Technol* 103:293-9.
- 541 27. Izquierdo JA, Goodwin L, Davenport KW, Teshima H, Bruce D, Detter C,  
542 Tapia R, Han S, Land M, Hauser L, Jeffries CD, Han J, Pitluck S, Nolan M,  
543 Chen A, Huntemann M, Mavromatis K, Mikhailova N, Liolios K, Woyke T,  
544 Lynd LR. 2012. Complete Genome Sequence of *Clostridium clariflavum* DSM  
545 19732. *Stand Genomic Sci* 6:104-15.

- 546 28. Giallo J. GC, and Belaich JP. 1985. Metabolism and Solubilization of  
547 Cellulose by *Clostridium cellulolyticum* H10. *Applied and Environmental*  
548 *Microbiology* 49:1216-1221.
- 549 29. Li LL, Taghavi S, Izquierdo JA, van der Lelie D. 2012. Complete genome  
550 sequence of *Clostridium* sp. strain BNL1100, a cellulolytic mesophile isolated  
551 from corn stover. *J Bacteriol* 194:6982-3.
- 552 30. Lee D. Mermelstein NEW, George N. Bennett, and Eleftherios T. Papoutsakis.  
553 1992. Expression of cloned homologous fermentative genes in *Clostridium*  
554 *acetobutylicum* ATCC 824. *Nature Biotechnology* 10:190-195.
- 555 31. F.A. Rainey AMD, P.H. Janssen, D. Saul, A. Rodrigo, P.L. Bergquist, R.M.  
556 Daniel, E. Stackebrandt and H.W. Morgan. 1994. Description of  
557 *Caldicellulosiruptorsaccharolyticus* gen. nov., sp. nov: An obligately anaerobic,  
558 extremely thermophilic, cellulolytic bacterium. *FEMS Microbiology Letters*  
559 120:263-266.
- 560 32. Gibbs MD, Reeves RA, Farrington GK, Anderson P, Williams DP, Bergquist  
561 PL. 2000. Multidomain and multifunctional glycosyl hydrolases from the  
562 extreme thermophile *Caldicellulosiruptor* isolate Tok7B.1. *Curr Microbiol*  
563 40:333-40.
- 564 33. Miroshnichenko ML, Kublanov IV, Kostrikina NA, Tourova TP, Kolganova  
565 TV, Birkeland NK, Bonch-Osmolovskaya EA. 2008. *Caldicellulosiruptor*  
566 *kronotskyensis* sp. nov. and *Caldicellulosiruptor hydrothermalis* sp. nov., two  
567 extremely thermophilic, cellulolytic, anaerobic bacteria from Kamchatka  
568 thermal springs. *Int J Syst Evol Microbiol* 58:1492-6.
- 569 34. Hamilton-Brehm SD, Mosher JJ, Vishnivetskaya T, Podar M, Carroll S,  
570 Allman S, Phelps TJ, Keller M, Elkins JG. 2010. *Caldicellulosiruptor*  
571 *obsidiansis* sp. nov., an anaerobic, extremely thermophilic, cellulolytic  
572 bacterium isolated from Obsidian Pool, Yellowstone National Park. *Appl*  
573 *Environ Microbiol* 76:1014-20.
- 574 35. Lochner A, Giannone RJ, Keller M, Antranikian G, Graham DE, Hettich RL.  
575 2011. Label-free quantitative proteomics for the extremely thermophilic  
576 bacterium *Caldicellulosiruptor obsidiansis* reveal distinct abundance patterns  
577 upon growth on cellobiose, crystalline cellulose, and switchgrass. *J Proteome*  
578 *Res* 10:5302-14.
- 579 36. Kanafusa-Shinkai S, Wakayama J, Tsukamoto K, Hayashi N, Miyazaki Y,  
580 Ohmori H, Tajima K, Yokoyama H. 2013. Degradation of microcrystalline  
581 cellulose and non-pretreated plant biomass by a cell-free extracellular  
582 cellulase/hemicellulase system from the extreme thermophilic bacterium  
583 *Caldicellulosiruptor bescii*. *J Biosci Bioeng* 115:64-70.

- 584 37. Basen M, Rhaesa AM, Kataeva I, Prybol CJ, Scott IM, Poole FL, Adams MW.  
585 2014. Degradation of high loads of crystalline cellulose and of unpretreated  
586 plant biomass by the thermophilic bacterium *Caldicellulosiruptor bescii*.  
587 *Bioresour Technol* 152:384-92.
- 588 38. Pason P, Kyu KL, Ratanakhanokchai K. 2006. *Paenibacillus curdlanolyticus*  
589 strain B-6 xylanolytic-cellulolytic enzyme system that degrades insoluble  
590 polysaccharides. *Appl Environ Microbiol* 72:2483-90.
- 591 39. Wang CM, Shyu CL, Ho SP, Chiou SH. 2008. Characterization of a novel  
592 thermophilic, cellulose-degrading bacterium *Paenibacillus* sp. strain B39. *Lett*  
593 *Appl Microbiol* 47:46-53.
- 594 40. Lal S, Tabacchioni S. 2009. Ecology and biotechnological potential of  
595 *Paenibacillus polymyxa*: a minireview. *Indian J Microbiol* 49:2-10.
- 596 41. Waeonukul R, Kyu KL, Sakka K, Ratanakhanokchai K. 2009. Isolation and  
597 characterization of a multienzyme complex (cellulosome) of the *Paenibacillus*  
598 *curdlanolyticus* B-6 grown on Avicel under aerobic conditions. *J Biosci*  
599 *Bioeng* 107:610-4.
- 600 42. Asha BM. 2012. Purification and Characterization of a Thermophilic Cellulase  
601 from a Novel Cellulolytic Strain, *Paenibacillus barcinonensis*. *Journal of*  
602 *Microbiology and Biotechnology* 22:1501-1509.
- 603 43. Park IH, Chang J, Lee YS, Fang SJ, Choi YL. 2012. Gene cloning of  
604 endoglucanase Cel5A from cellulose-degrading *Paenibacillus xylanilyticus*  
605 KJ-03 and purification and characterization of the recombinant enzyme.  
606 *Protein J* 31:238-45.
- 607 44. Poehlein A, Zverlov VV, Daniel R, Schwarz WH, Liebl W. 2013. Complete  
608 Genome Sequence of *Clostridium stercorarium* subsp. *stercorarium* Strain  
609 DSM 8532, a Thermophilic Degrader of Plant Cell Wall Fibers. *Genome*  
610 *Announc* 1:e0007313.
- 611 45. Weimer PJ, Price NP, Kroukamp O, Joubert LM, Wolfaardt GM, Van Zyl WH.  
612 2006. Studies of the extracellular glycocalyx of the anaerobic cellulolytic  
613 bacterium *Ruminococcus albus* 7. *Appl Environ Microbiol* 72:7559-66.
- 614 46. Guy L, Kultima JR, Andersson SG. 2010. genoPlotR: comparative gene and  
615 genome visualization in R. *Bioinformatics* 26:2334-5.
- 616 47. Xia Y, Wang Y, Wang Y, Chin FY, Zhang T. 2016. Cellular adhesiveness and  
617 cellulolytic capacity in Anaerolineae revealed by omics-based genome  
618 interpretation. *Biotechnol Biofuels* 9:111.
- 619 48. Lopez-Contreras A.M., Martens A. A., Szijarto N., Mooibroek H., Pieterneel A.  
620 Claassen M., John van der Oost and Willem M. de Vos. Production by  
621 *Clostridium acetobutylicum* ATCC 824 of CelG, a cellulosomal glycoside

622 hydrolase belonging to family 9. *Applied and Environmental Microbiology* 69:  
623 869-877.

624
